# Supplementary material for: The impact of swidden decline on livelihoods and ecosystem services in Southeast Asia: A review of the evidence from 1990 to 2015
Source: Springer Nature journal article supplement (doi:10.1007/s13280-016-0836-z), 2016-11-16
Supplement: MOESM1 [file 15654676]

## **Ambio: Electronic Supplementary Material (ESM)**

This supplementary material has not been peer reviewed.

Title: The impact of swidden decline on livelihoods and ecosystem services in Southeast Asia: a review of the evidence from 1990 to 2015

Authors: Wolfram Dressler, David Wilson, Jessica Clendenning, Rob Cramb, Rodney Keenan, Sango Mahanty, Thilde Bech Bruun, Ole Mertz, Rodel D. Lasco

### **Contents**

[Table S1. Literature Search Results](#)

[Table S2 List of studies included in the final review](#)

[Table S3. Critical Appraisal Tool](#)

[Table S4 Risk of Bias Tool](#)

[Table S5 Summary of drivers and outcomes with explanations for each category](#)

[Table S6: Details of studies included in the quantitative meta-analysis.](#)

**Table S1. Literature Search Results**

| <b>Ref</b> | <b>Database/Source</b>                   | <b>Date Search Conducted</b> | <b># of results</b> | <b>Search terms, strings and combinations used</b>                                                                                                                                                                                                                                | <b>Search Period</b> |
|------------|------------------------------------------|------------------------------|---------------------|-----------------------------------------------------------------------------------------------------------------------------------------------------------------------------------------------------------------------------------------------------------------------------------|----------------------|
| 1          | Agricola                                 | 08-Jul-14                    |                     | swidden OR shifting OR Rotation* OR "slash and burn" AND livelihood* OR cash OR production OR yield OR income AND ecosystem OR soil OR water OR carbon AND upland AND south east asia OR Philippines OR Thailand OR Malaysia OR Indonesia OR Cambodia OR Laos OR Papua New Guinea | n/a                  |
| 2          | ScienceDirect                            | 08-Jul-14                    | 207                 | (Swidden OR shifting OR Rotation* OR "slash and burn") AND (livelihood*) AND (ecosystem) AND (upland) AND (Thailand OR Vietnam OR "Viet Nam" OR Cambodia OR Laos OR Philippines OR Indonesia OR Myanmar OR Burma OR Malaysia OR "Papua New Guinea" OR "Southeast Asia")           | 1945 - Present       |
| 3          | Springlink                               | 08-Jul-14                    | 213                 | (Swidden OR shifting OR Rotation* OR "slash and burn") AND (livelihood*) AND (ecosystem) AND (upland) AND (Thailand OR Vietnam OR "Viet Nam" OR Cambodia OR Laos OR Philippines OR Indonesia OR Myanmar OR Burma OR Malaysia OR "Papua New Guinea" OR "Southeast Asia")           | 1945 - Present       |
| 4          | Directory of Open Access Journals (DOAJ) | 09-Jul-14                    | 6                   | swidden OR shifting OR Rotation OR "slash and burn" AND Asia                                                                                                                                                                                                                      | Any                  |
| 5          | Directory of Open Access Journals (DOAJ) | 09-Jul-14                    | 1                   | swidden OR shifting OR Rotation OR "slash and burn" AND Philippines                                                                                                                                                                                                               | Any                  |
| 6          | Directory of Open Access Journals (DOAJ) | 09-Jul-14                    | 1                   | swidden OR shifting OR Rotation OR "slash and burn" AND Laos                                                                                                                                                                                                                      | Any                  |
| 7          | Directory of Open Access Journals        | 09-Jul-14                    | 4                   | swidden OR shifting OR Rotation OR "slash and burn" AND Vietnam                                                                                                                                                                                                                   | Any                  |

| Ref | Database/Source                                                                          | Date Search Conducted | # of results | Search terms, strings and combinations used                                                                                                                                                                                                                                       | Search Period |
|-----|------------------------------------------------------------------------------------------|-----------------------|--------------|-----------------------------------------------------------------------------------------------------------------------------------------------------------------------------------------------------------------------------------------------------------------------------------|---------------|
|     | (DOAJ)                                                                                   |                       |              |                                                                                                                                                                                                                                                                                   |               |
| 8   | AGRIS: International Information System of the Agricultural Science and Technology (FAO) | 09-Jul-14             | 15           | swidden OR shifting OR Rotation* OR "slash and burn" AND south east asia OR Philippines OR Thailand OR Malaysia OR Indonesia OR Cambodia OR Laos OR Papua New Guinea                                                                                                              | Any           |
| 9   | Web of Science (v.5.13.2)                                                                | 10-Jul-14             | 4,579        | Search Strings 1, 1a, 2 and 3                                                                                                                                                                                                                                                     | 1945 - 2014   |
| 10  | Web of Science (v.5.13.2)                                                                | 10-Jul-14             | 3,867        | Search Strings 1, 2 and 3a                                                                                                                                                                                                                                                        | 1945 - 2014   |
| 11  | Ebrary                                                                                   | 10-Jul-14             | 129          | swidden OR shifting OR Rotation* OR "slash and burn" AND livelihood* OR cash OR production OR yield OR income AND ecosystem OR soil OR water OR carbon AND upland AND south east asia OR Philippines OR Thailand OR Malaysia OR Indonesia OR Cambodia OR Laos OR Papua New Guinea | Any           |
| 12  | US Forestry: TreeResearch                                                                | 10-Jul-14             | 8            | shifting cultivation                                                                                                                                                                                                                                                              | Any           |
| 13  | FAO Catalogue Online                                                                     | 10-Jul-14             | 8            | swidden                                                                                                                                                                                                                                                                           | Any           |
| 14  | British Library                                                                          | 10-Jul-14             | 35           | shifting cultivation AND asia                                                                                                                                                                                                                                                     | Any           |
| 15  | British Library                                                                          | 10-Jul-14             | 29           | swidden AND asia                                                                                                                                                                                                                                                                  | Any           |
| 16  | British Library                                                                          | 10-Jul-14             | 17           | slash and burn AND asia                                                                                                                                                                                                                                                           | Any           |
| 17  | British Library                                                                          | 10-Jul-14             | 14           | Forest fallow AND Asia                                                                                                                                                                                                                                                            | Any           |
| 18  | British Library                                                                          | 11-Jul-14             | 47           | Upland Agriculture AND Asia                                                                                                                                                                                                                                                       | Any           |
| 19  | World Bank Open Knowledge Repository                                                     | 11-Jul-14             | 8            | "shifting cultivation" AND asia                                                                                                                                                                                                                                                   | Any           |
| 20  | World Environment Library collection                                                     | 11-Jul-14             | 7            | "shifting cultivation"                                                                                                                                                                                                                                                            | Any           |
| 21  | UN University Library Catalogue                                                          | 11-Jul-14             | 5            | "swidden OR "shifting cultivation" OR "slash and burn" AND "southeast asia"                                                                                                                                                                                                       | Any           |

| Ref | Database/Source                            | Date Search Conducted | # of results | Search terms, strings and combinations used                                                                                                                                    | Search Period |
|-----|--------------------------------------------|-----------------------|--------------|--------------------------------------------------------------------------------------------------------------------------------------------------------------------------------|---------------|
| 22  | Agricola (articles)                        | 11-Jul-14             | 10           | slash and burn                                                                                                                                                                 | Any           |
| 23  | Agricola (articles)                        | 11-Jul-14             | 37           | shifting cultivation                                                                                                                                                           | Any           |
| 24  | Agricola (articles)                        | 11-Jul-14             | 5            | swidden                                                                                                                                                                        | Any           |
| 25  | Agricola (books)                           | 11-Jul-14             | 20           | slash and burn                                                                                                                                                                 | Any           |
| 26  | Agricola (books)                           | 11-Jul-14             | 13           | shifting cultivation                                                                                                                                                           | Any           |
| 27  | Agricola (books)                           | 11-Jul-14             | 103          | swidden                                                                                                                                                                        | Any           |
| 28  | PlosOne                                    | 14-Jul-14             | 26           | (((everything:swidden) OR everything:"slash and burn") OR everything:"shifting cultivation") AND everything:"southeast Asia"                                                   | Any           |
| 29  | FAO Publications                           | 14-Jul-14             | 12           | swidden OR "Shifting Cultivation" OR "slash and burn" AND southeast Asia                                                                                                       | Any           |
| 30  | Wil de Jong (Response to Literature Call)  | 16-Jul-14             | 6            | n/a                                                                                                                                                                            | n/a           |
| 31  | Judith Mayer (Response to Literature Call) | 16-Jul-14             | 16           | n/a                                                                                                                                                                            | n/a           |
| 32  | Carol Colfer (Response to Literature Call) | 16-Jul-14             | 19           | n/a                                                                                                                                                                            | n/a           |
| 33  | 'Christel' (Response to Literature Call)   | 16-Jul-14             | 4            | n/a                                                                                                                                                                            | n/a           |
| 34  | Google                                     | 17-Jul-14             | 72           | swidden OR shifting OR Rotation* OR "slash and burn" AND upland AND southeast asia OR Philippines OR Thailand OR Malaysia OR Indonesia OR Cambodia OR Laos OR Papua New Guinea | Any           |

| Ref | Database/Source      | Date Search Conducted | # of results | Search terms, strings and combinations used                                                                                                                                                                                                                                                                                                                                                                                                                                                                                                                       | Search Period |
|-----|----------------------|-----------------------|--------------|-------------------------------------------------------------------------------------------------------------------------------------------------------------------------------------------------------------------------------------------------------------------------------------------------------------------------------------------------------------------------------------------------------------------------------------------------------------------------------------------------------------------------------------------------------------------|---------------|
| 35  | CAB                  | 15-Jul-14             | 548          | 1 and 2 and 3<br>(Thailand OR Vietnam OR "Viet Nam" OR Cambodia* OR Laos OR "Lao PDR" OR Philippines OR Myanmar OR Burma OR Malaysia* OR "Papua New Guinea" OR "Southeast Asia" ) AND (Swidden* OR "Slash AND burn" OR "shifting cultivation" OR "forest fallow*" OR fallow* OR "upland farm*" OR rotation* OR farm* OR regrowth OR "hill tribe" OR tradition* OR integral OR mixed) AND (Livelihood* OR income OR crop OR production OR yield OR portfolio OR wealth OR surplus OR risk OR vulnerability OR inequality OR diversif* OR specialisation OR needs ) | Any           |
| 36  | CAB                  | 15-Jul-14             | 357          | 1 and 2 and 3a<br>Thailand OR Vietnam OR "Viet OR Nam" OR cambodia* OR Laos OR "Lao OR PDR" OR Philippines OR Myanmar OR Burma OR malaysia* OR "Papua AND New Guinea" OR "Southeast AND Asia" AND swidden* AND "Slash AND burn" OR "shifting OR cultivation" OR "forest OR fallow*" OR fallow* OR "upland OR farm*" OR rotation* OR farm* OR regrowth OR "hill OR tribe" OR tradition* OR integral OR mixed AND ecosystem* OR "Environmentalservice" OR "natural resource*" OR soil OR carbon                                                                     | Any           |
| 37  | JSTOR                | 18-Jul                | 877          | ((("Southeast Asia") AND (Swidden* OR "shifting cultivation" OR fallow)) AND (Livelihood* OR income )) AND ( soil or carbon))                                                                                                                                                                                                                                                                                                                                                                                                                                     | Any           |
| 38  | Wiley Online Library | 20-Jul-14             | 337          | 1 and 3 and 3a (full text) and 2 (abstract)                                                                                                                                                                                                                                                                                                                                                                                                                                                                                                                       | 1945-2014     |

| Ref | Database/Source      | Date Search Conducted | # of results | Search terms, strings and combinations used                                                                                                                                                                                                                                                                                                                                                                                                                                                                                                                                                                                  | Search Period |
|-----|----------------------|-----------------------|--------------|------------------------------------------------------------------------------------------------------------------------------------------------------------------------------------------------------------------------------------------------------------------------------------------------------------------------------------------------------------------------------------------------------------------------------------------------------------------------------------------------------------------------------------------------------------------------------------------------------------------------------|---------------|
| 39  | Wiley Online Library |                       |              | Thailand OR Vietnam OR "Viet Nam" OR Cambodia* OR Laos OR "Lao PDR" OR Philippines OR Myanmar OR Burma OR Malaysia* OR "Papua New Guinea" OR "Southeast Asia" in FullText AND Swidden* OR "Slash and burn" OR "shifting cultivation" OR "forest fallow*" OR fallow* OR "upland farm*" OR rotation* in Abstract AND Livelihood* OR income OR crop OR production OR yield OR portfolio OR wealth OR surplus OR risk OR vulnerability OR inequality OR diversif* OR specialisation in FullText AND ecosystem* OR "Environmental service" OR "natural resource*" OR soil OR carbon in FullText between years 1945 and 2014       |               |
| 40  | Scopus               | 20-Jul-14             | 7,138        | 1 and 1a and 2 and 3 and 3a                                                                                                                                                                                                                                                                                                                                                                                                                                                                                                                                                                                                  | Any           |
| 41  | Scopus               |                       |              | thailand OR vietnam OR "Viet Nam" OR cambodia* OR laos OR "Lao PDR" OR philippines OR myanmar OR burma OR malaysia* OR "Papua New Guinea" OR "Southeast Asia" OR "Greater Mekong" AND uplands OR montane OR slop* OR elevate* OR mountain* OR hill* AND swidden* OR "Slash and burn" OR "shifting cultivation" OR "forest fallow*" OR fallow* OR "upland farm*" OR rotation* OR indigenous AND livelihood* OR income OR crop OR production OR yield OR portfolio OR wealth OR surplus OR risk OR vulnerability OR inequality OR diversif* AND ecosystem* OR "Environmental service" OR "natural resource*" OR soil OR carbon | Any           |
| 45  | Google Scholar       | 22-Jul                | 1570         | Normal search: "shifting cultivation" or "swidden" or "slash and burn" and "southeast Asia"                                                                                                                                                                                                                                                                                                                                                                                                                                                                                                                                  | any           |

| <b>Ref</b> | <b>Database/Source</b>                                                                 | <b>Date Search Conducted</b> | <b># of results</b> | <b>Search terms, strings and combinations used</b> | <b>Search Period</b> |
|------------|----------------------------------------------------------------------------------------|------------------------------|---------------------|----------------------------------------------------|----------------------|
| 46         | National Agriculture and Forestry Research Institute (NAFRI): LAO Agriculture Database | 22-Jul                       | 10                  | Swidden                                            | any                  |
| 47         | National Agriculture and Forestry Research Institute (NAFRI): LAO Agriculture Database | 22-Jul                       | 22                  | "Shifting cultivation"                             | Any                  |
| 48         | Malaysia Journal of Tropical Forest Science                                            | 22-Jul                       | 2                   | Swidden                                            | Any                  |
| 49         | Malaysia Journal of Tropical Forest Science                                            | 22-Jul                       | 2                   | "Shifting cultivation"                             | Any                  |

| Ref | Database/Source                                        | Date Search Conducted | # of results | Search terms, strings and combinations used                                                                                                                                                                                                                                                                                                                                                                                                                                                                                                                                                                                                                                                                                                                                                                                                                                                                                                                                                                                                                                                                                                                                                                                                                                                                                                                                                                                                                                                                                                                                                                                 | Search Period |
|-----|--------------------------------------------------------|-----------------------|--------------|-----------------------------------------------------------------------------------------------------------------------------------------------------------------------------------------------------------------------------------------------------------------------------------------------------------------------------------------------------------------------------------------------------------------------------------------------------------------------------------------------------------------------------------------------------------------------------------------------------------------------------------------------------------------------------------------------------------------------------------------------------------------------------------------------------------------------------------------------------------------------------------------------------------------------------------------------------------------------------------------------------------------------------------------------------------------------------------------------------------------------------------------------------------------------------------------------------------------------------------------------------------------------------------------------------------------------------------------------------------------------------------------------------------------------------------------------------------------------------------------------------------------------------------------------------------------------------------------------------------------------------|---------------|
| 50  | ProQuest via the Swedish Uni for Agricultural Sciences | 12-Aug                | 1839         | loc(Thailand OR Vietnam OR "Viet Nam" OR Cambodia* OR Laos OR "Lao PDR" OR Philippines OR Myanmar OR Burma OR Malaysia* OR "Papua New Guinea" OR "Southeast Asia" OR "Greater Mekong" OR zamia OR Borneo OR "Indonesia* archipelago" OR "Indo-China" OR Malaya OR Kampuchea OR Sarawak OR "British North Borneo" OR "insular south east Asia" OR "Netherlands East Indies" OR Siam OR "peninsular Malaysia" OR Pacific) AND ab(swidden* OR "Slash and burn" OR "shifting cultivation" OR "forest fallow*" OR fallow* OR "upland farm*" OR rotation* OR farm* OR barbarian OR "ethnic minorit*" OR indigenous OR custom* OR pioneer* OR "forest eaters" OR montane OR imperator OR "enriched fallow" OR "long fallow" OR "forest-fallow" OR "rural poor" OR peasant OR "forest farm*" OR agriculture* OR regrowth OR "hill tribe" OR tradition* OR integral OR mixed) AND ab(Livelihood* OR income OR crop OR production OR yield OR portfolio OR wealth OR surplus OR risk OR vulnerability OR inequality OR diversify* OR speciali action OR needs OR capital OR education OR remit* OR migration OR reloaction OR dependency OR subsisted* OR cash OR market OR credit OR debt OR loan* OR land OR rich OR poor OR disparity OR secure* OR mortality OR nutrition OR deaths OR morbidity OR sufficient* OR asset* OR access OR food OR staple OR trade OR "non-timber forest product*" OR "non-wood forest product*" OR "minor forest product*" OR NTFP OR wildlife OR game OR bushmeat OR "bush meat" OR fish OR hunt* OR bird*) AND all(ecosystem* OR "Environmental service" OR "natural resource*" OR soil OR carbon) | Any           |



**Table S2 List of studies included in the final review**

| UNID | DOC ID | Author(s)                                                       | Publication Year | Journal/Publication                                | Publication Title                                                                                                                                                      |
|------|--------|-----------------------------------------------------------------|------------------|----------------------------------------------------|------------------------------------------------------------------------------------------------------------------------------------------------------------------------|
| 001  | 6877   | Ole Mertz & Kelvin Egay & Thilde Bech Bruun & Tina Svan Colding | 2013             | Human Ecology                                      | The Last Swiddens of Sarawak, Malaysia                                                                                                                                 |
| 002  | 16574  | T. S. Hansen & O. Mertz                                         | 2006             | Land Degradation & Development                     | Extinction Or Adaptation? Three Decades Of Change In Shifting Cultivation In Sarawak, Malaysia                                                                         |
| 003  | 16574  | T. S. Hansen & O. Mertz                                         | 2006             | Land Degradation & Development                     | Extinction Or Adaptation? Three Decades Of Change In Shifting Cultivation In Sarawak, Malaysia                                                                         |
| 004  | 1086   | Doolittle, Amity A.                                             | 2001             | Human Ecology                                      | From Village Land to “Native Reserve”: Changes in Property Rights in Sabah, Malaysia, 1950–1996                                                                        |
| 005  | 1915   | Terauchi, D. et al.                                             | 2014             | Open Journal of Forestry                           | Implication for Designing a REDD+ Program in a Frontier of Oil Palm Plantation Development: Evidence in East Kalimantan, Indonesia                                     |
| 006  | 4894   | Evans, Phanvilay, K., Fox, J., Vogler, J.                       | 2011             | Journal of Land Use Science                        | An agent-based model of agricultural innovation, land-cover change and household inequality: the transition from swidden cultivation to rubber plantations in Laos PDR |
| 007  | 5201   | Belsky and Siebert, S.F                                         | 2003             | Agriculture and Human Values                       | Cultivating cacao: Implications of sun-grown cacao on local food security and environmental sustainability                                                             |
| 008  | 5229   | Forsyth& Evans, N.                                              | 2012             | World Development                                  | What is Autonomous Adaption? Resource Scarcity and Smallholder Agency in Thailand                                                                                      |
| 009  | 5349   | Seidenberg, Mertz and Kias                                      | 2003             | Geografisk Tidsskrift- Danish Journal of Geography | Fallow, labour and livelihood in shifting cultivation: Implications for deforestation in northern Lao PDR                                                              |
| 010  | 6102   | Feintrenie, L., S. Schwarze, and P. Levang.                     | 2010             | Ecology and Societ                                 | Are local people conservationists? Analysis of transition dynamics from agroforests to monoculture plantations in Indonesia                                            |
| 011  | 7475   | Ducourtieux, O                                                  | 2006             | NAFRI Workshop Proceedings                         | SHIFTING CULTIVATION AND POVERTY ERADICATION: A COMPLEX ISSUE                                                                                                          |
| 013  | 16375  | Linguist, B et al.                                              | 2007             | Mountain Research and Development                  | Montane paddy rice: Development and effects on food security and livelihood activities of highland Lao farmers                                                         |
| 014  | 16504  | Pandey, S and van Minh                                          | 1998             | Agriculture, Ecosystems and Environment            | A socio-economic analysis of rice production systems in the uplands of northern Vietnam                                                                                |

| UNID | DOC ID | Author(s)                                            | Publication Year | Journal/Publication                      | Publication Title                                                                                                                                                                               |
|------|--------|------------------------------------------------------|------------------|------------------------------------------|-------------------------------------------------------------------------------------------------------------------------------------------------------------------------------------------------|
| 015  | 16558  | Dressler, W and Pulhin, J                            | 2010             | Agriculture and Human Values             | The shifting ground of swidden agriculture on Palawan Island, the Philippines                                                                                                                   |
| 016  | 16589  | Nyuk-Wo Lim, J. and Douglas, I.                      | 1998             | Asia Pacific Viewpoint                   | The impact of cash cropping on shifting cultivation in Sabah, Malaysia                                                                                                                          |
| 017  | 16643  | Vongvisouk, T. et al.                                | 2014             | Applied Geography                        | Shifting cultivation stability and change: Contrasting pathways of land use and livelihood change in Laos                                                                                       |
| 018  | 16689  | Cramb, R.A. et al.                                   | 2009             | Human Ecology                            | Swidden Transformations and Rural Livelihoods in Southeast Asia                                                                                                                                 |
| 019  | 16689  | Cramb, R.A. et al.                                   | 2009             | Human Ecology                            | Swidden Transformations and Rural Livelihoods in Southeast Asia                                                                                                                                 |
| 020  | 16689  | Cramb, R.A. et al.                                   | 2009             | Human Ecology                            | Swidden Transformations and Rural Livelihoods in Southeast Asia                                                                                                                                 |
| 021  | 16899  | Hariyadi, B and Ticktin, T.                          | 2012             | Human Ecology                            | From Shifting Cultivation to Cinnamon Agroforestry: Changing Agricultural Practices Among the Serampas in the Kerinci Seblat National Park, Indonesia                                           |
| 022  | 17207  | Olivier Ducourtieux, et al.                          | 2005             | Development and Change                   | Land Policy and Farming Practices in Laos                                                                                                                                                       |
| 023  | 17198  | Mucahid Mustafa Bayrak, Tran Nam Tu and Paul Burgers | 2015             | Book Chapter (Cairns, 2015, eds.)        | Formal and Indigenous Forest-Management Systems in Central Vietnam                                                                                                                              |
| 025  | 7486   | Yokoyama, S                                          | 2003             | PhD Thesis                               | Geographical study on the basis for existence of mountainous Villages in northern Laos                                                                                                          |
| 026  | 7551   | Rerkasem and Rerkasem                                | 1994             | IIED Report                              | Shifting Cultivation in Thailand : its current situation and dynamics in the context of highland development Faculty of Agriculture terms of what was most relevant to the particular country . |
| 027  | 7551   | Rerkasem and Rerkasem                                | 1994             | IIED Report                              | Shifting Cultivation in Thailand : its current situation and dynamics in the context of highland development Faculty of Agriculture terms of what was most relevant to the particular country . |
| 028  | 7551   | Rerkasem and Rerkasem                                | 1994             | IIED Report                              | Shifting Cultivation in Thailand : its current situation and dynamics in the context of highland development Faculty of Agriculture terms of what was most relevant to the particular country . |
| 029  | 7811   | Kanazawa, H., Hoshikawa, K. and Nawata, E.           | 2006             | Japanese Journal of Tropical Agriculture | The changes in land use and agricultural systems of Karen people in North Thailand - a case study of Sam                                                                                        |

| UNID | DOC ID | Author(s)                                       | Publication Year | Journal/Publication                     | Publication Title                                                                                                                                              |
|------|--------|-------------------------------------------------|------------------|-----------------------------------------|----------------------------------------------------------------------------------------------------------------------------------------------------------------|
|      |        |                                                 |                  |                                         | Sop Bon village                                                                                                                                                |
| 030  | 7461   | Roberts, M                                      | 2011             | PhD Thesis                              | Traditional Beliefs and Farmer Decision- Making in the Uplands of Northern Lao PDR                                                                             |
| 031  | 712    | Grange & Kansuntisukmongkol                     | 2004             | SuperSoil Proceedings                   | Impact of fallow length on soil structure and soil water characteristics in a swidden cultivation system of western Thailand                                   |
| 032  | 4972   | Tanaka Tachibe, S et al                         | 2009             | Agriculture, Ecosystems and Environment | Soil characteristics under cash crop farming in upland areas of Sarawak, Malaysia                                                                              |
| 033  | 7374   | Neergaard, Magid and Mertz                      | 2008             | Agriculture, Ecosystems and Environment | Soil erosion from shifting cultivation and other smallholder land use in Sarawak, Malaysia                                                                     |
| 034  | 15004  | Chaplot, V. , Le Bissonnais, Y. and Bernadou, J | 2006             | T&F Book Chapter                        | Runoff, soil, and soil organic carbon losses within a small sloping-land catchment of Laos under shifting cultivation                                          |
| 035  | 15579  | Saito, K. et al.                                | 2006             | Plant Soil                              | Cropping intensity and rainfall effects on upland rice yields in northern Laos                                                                                 |
| 036  | 16308  | Woo et al.                                      | 2011             | Agriculture, Ecosystems and Environment | Stand structure and natural regeneration of degraded forestland in the northern mountainous region of Vietnam                                                  |
| 037  | 16308  | Woo et al.                                      | 2011             | Landscape Ecol Eng                      | Stand structure and natural regeneration of degraded forestland in the northern mountainous region of Vietnam                                                  |
| 038  | 16148  | Sillitoe, P                                     | 1996             | Singapore Journal of Tropical Geography | FALLOW AND FERTILITY UNDER SUBSISTENCE CULTIVATION IN THE PAPUA NEW GUINEA HIGHLANDS: II. SOIL FERTILITY                                                       |
| 039  | 16392  | Funakawa, S. et al                              | 1997             | Soil Science and Plant Nutrition        | Physicochemical properties of the soils associated with shifting cultivation in northern Thailand with special reference to factors determining soil fertility |
| 040  | 16392  | Funakawa, S. et al                              | 1997             | Soil Science and Plant Nutrition        | Physicochemical properties of the soils associated with shifting cultivation in northern Thailand with special reference to factors determining soil fertility |
| 041  | 16392  | Funakawa, S. et al                              | 1997             | Soil Science and Plant Nutrition        | Physicochemical properties of the soils associated with shifting cultivation in northern Thailand with special reference to factors determining soil fertility |
| 042  | 16548  | Aumtong, S. et al                               | 2009             | Agriculture, Ecosystems and Environment | Relating soil carbon fractions to land use in sloping uplands in northern Thailand                                                                             |
| 043  | 16551  | Dupin, B et al.                                 | 2009             | Soil & Tillage Research                 | Assessment of tillage erosion rates on steep slopes in northern Laos                                                                                           |

| UNID | DOC ID | Author(s)                                         | Publication Year | Journal/Publication                     | Publication Title                                                                                                                                                                   |
|------|--------|---------------------------------------------------|------------------|-----------------------------------------|-------------------------------------------------------------------------------------------------------------------------------------------------------------------------------------|
| 044  | 16744  | Bruun, T.B. et al.                                | 2013             | Agriculture, Ecosystems and Environment | Improved sampling methods document decline in soil organic carbon stocks and concentrations of permanganate oxidizable carbon after transition from swidden to oil palm cultivation |
| 045  | 16691  | Watanabe, E. et al.                               | 2004             | Southeast Asian Studies                 | Soil fertility and farming systems in a slash and burn cultivation area of Northern Laos                                                                                            |
| 046  | 17211  | Tanaka, S et al.                                  | 1997             | Soil Science and Plant Nutrition        | Soil ecological study on dynamics of K, Mg, and Ca, and soil acidity in shifting cultivation in Northern Thailand                                                                   |
| 047  | 7482   | Kenzo, T et al                                    | 2010             | Forest Ecology and Management           | Changes in above-and belowground biomass in early successional tropical secondary forests after shifting cultivation in Sarawak, Malaysia                                           |
| 048  | 16273  | Silva Carreiras, J.M.B., Rosa, I., Pereira, J.M.C | 2011             | J. Geophys. Res                         | Greenhouse gas emissions from shifting cultivation in the tropics, including uncertainty and sensitivity analysis                                                                   |
| 049  | 17186  | Bruun, T.B. et al.                                | 2014             | IREDD Project Report                    | Impacts of reducing emissions from deforestation and forest degradation and enhancement of forest carbon stocks                                                                     |
| 050  | 17186  | Bruun, T.B. et al.                                | 2014             | IREDD Project Report                    | Impacts of reducing emissions from deforestation and forest degradation and enhancement of forest carbon stocks                                                                     |
| 051  | 16041  | Van Dung, N et al.                                | 2008             | Agriculture, Ecosystems and Environment | Analysis of the sustainability within the composite swidden agroecosystem in northern Vietnam                                                                                       |
| 052  | 17212  | Chan et al.                                       | 2013             | Forest Ecology and Management           | Establishment of allometric models and estimation of biomass recovery of swidden cultivation fallows in mixed deciduous forests of the Bago Mountains, Myanmar                      |
| 054  | 16629  | Valentin, C. et al                                | 2008             | Agriculture, Ecosystems and Environment | Runoff and sediment losses from 27 upland catchments in Southeast Asia: Impact of rapid land use changes and conservation practices                                                 |
| 055  | 16677  | Lestrelin, G. et al.                              | 2012             | Natural Resources Forum                 | Challenging established narratives on soil erosion and shifting cultivation in Laos                                                                                                 |
| 056  | 4556   | Wezel, A                                          | 2002             | Land Degradation & Development          | Temporal changes of resource use, soil fertility and economic situation in upland northwest Vietnam                                                                                 |
| 057  | 15920  | Tyynela, T. , Otsamo, R. and                      | 2003             | Agroforestry Systems                    | Indigenous livelihood systems in industrial tree-                                                                                                                                   |

| UNID | DOC ID | Author(s)                                                       | Publication Year | Journal/Publication                     | Publication Title                                                                                                                       |
|------|--------|-----------------------------------------------------------------|------------------|-----------------------------------------|-----------------------------------------------------------------------------------------------------------------------------------------|
|      |        | Otsamo, A.                                                      |                  |                                         | plantation areas in West Kalimantan, Indonesia: Economics and plant-species richness                                                    |
| 058  | 1861   | Nguyen Patanothai, A., Rambo, A.T.                              | 2004             | Southeast Asian Studies                 | Recent changes in the composite swidden farming system of a Da Bac Tay ethnic minority community in Vietnam's northern mountain region  |
| 059  | 4262   | McCarthy, J.F.                                                  | 2010             | Journal of Peasant Studies              | Processes of inclusion and adverse incorporation: Oil palm and agrarian change in Sumatra, Indonesia                                    |
| 061  | 17189  | Lawrence, D. et al.                                             | 2007             | Book Chapter (Cairns, 2007 eds.)        | Does Tree Diversity Affect Soil Fertility? Findings from Fallow Systems in West Kalimantan                                              |
| 062  | 9173   | La-Orngoplew, W                                                 | 2012             | PhD Thesis                              | Living under the rubber 'boom' : market integration and agrarian transformations in the Lao uplands.                                    |
| 063  | 11516  | Martin Rudbeck Jepsen                                           | 2006             | Forest Ecology and Management           | Above-ground carbon stocks in tropical fallows, Sarawak, Malaysia                                                                       |
| 064  | 16785  | Bruun, T.B. et al.                                              | 2006             | Agriculture, Ecosystems and Environment | Linking yields of upland rice in shifting cultivation to fallow length and soil properties                                              |
| 065  | 16544  | Roder et al.                                                    | 1995             | Plant and Soil                          | Relationships between soil, fallow period, weeds and rice yield in slash-and-burn systems of Laos                                       |
| 066  | 17216  | Funakawa, S. et al                                              | 1997             | Soil Science and Plant Nutrition        | Ecological study on the dynamics of soil organic matter and its related properties in shifting cultivation systems of Northern Thailand |
| 067  | 17216  | Funakawa, S. et al                                              | 1997             | Soil Science and Plant Nutrition        | Ecological study on the dynamics of soil organic matter and its related properties in shifting cultivation systems of Northern Thailand |
| 068  | 17216  | Funakawa, S. et al                                              | 1997             | Soil Science and Plant Nutrition        | Ecological study on the dynamics of soil organic matter and its related properties in shifting cultivation systems of Northern Thailand |
| 069  | 17215  | Catherine Hepp                                                  | 2013             | Copenhagen Thesis                       | The Ecological Sustainability of Short Fallow Shifting Cultivation in Upland Systems                                                    |
| 101  | 1105   | Wolfram Dressler & Melanie McDermott & Will Smith & Juan Pulhin | 2012             | Human Ecology                           | REDD Policy Impacts on Indigenous Property Rights Regimes on Palawan Island, the Philippines                                            |
| 102  | 1940   | Mucahid Mustafa Bayrak, Tran Nam Tu,                            | 2013             | Journal of Political Ecology            | Restructuring space in the name of development: the sociocultural impact of the Forest Land Allocation                                  |

| UNID | DOC ID | Author(s)                                                                                  | Publication Year | Journal/Publication                                                | Publication Title                                                                                                                                                                    |
|------|--------|--------------------------------------------------------------------------------------------|------------------|--------------------------------------------------------------------|--------------------------------------------------------------------------------------------------------------------------------------------------------------------------------------|
|      |        | and Paul Burgers                                                                           |                  |                                                                    | Program on the indigenous Co Tu people in Central Vietnam                                                                                                                            |
| 103  | 8082   | William D. Sunderlin,<br>Ida Aju Pradnja Resosudarmo,<br>Edy Rianto, and<br>Arild Angelsen | 2000             | CIFOR Occasional Paper                                             | The Effect of Indonesia's Economic Crisis on Small Farmers and Natural Forest Cover in the Outer Islands                                                                             |
| 104  | 7890   | Dendi, A. et al                                                                            | 2004             | Land Degradation & Development                                     | Evolution of the Minangkabau's shifting cultivation in the West Sumatra highland of Indonesia and its strategic implications for dynamic farming systems                             |
| 105  | 8002   | Palao, L K M, et al                                                                        | 2011             | Asia Life Sciences                                                 | Changes in indigenous land use system: from swidden to sedentary agriculture                                                                                                         |
| 106  | 8072   | Penot , E                                                                                  | 2004             | Book Chapter                                                       | From shifting agriculture to sustainable complex rubber agroforestry systems (jungle rubber) in Indonesia: a history of innovation processes                                         |
| 107  | 8129   | de Jong, W                                                                                 | 2001             | Book Chapter: Agricultural Technologies and Tropical Deforestation | The impact of rubber on the forest landscape in Borneo                                                                                                                               |
| 109  | 8936   | Alberny, E                                                                                 | 2009             | Masters Thesis                                                     | Dynamics of rubber plantation in Lao PDR                                                                                                                                             |
| 110  | 14766  | Cohen, P.T.                                                                                | 2000             | The Geographical Journal                                           | Resettlement, opium and labour dependence: Akha-Tai relations in northern Laos                                                                                                       |
| 111  | 16497  | Wadley, R.L. and Mertz, O.                                                                 | 2005             | Agricultural Systems                                               | Pepper in a time of crisis: Smallholder buffering strategies in Sarawak, Malaysia and West Kalimantan, Indonesia                                                                     |
| 112  | 17001  | Castella, J.C. et al                                                                       | 2006             | Land Use Policy                                                    | Impact of forestland allocation on land use in a mountainous province of Vietnam                                                                                                     |
| 113  | 17184  | Koczberski, G. , Curry, G.N. and Bue, V                                                    | 2012             | Asia Pacific Viewpoint                                             | Oil palm , food security and adaptation among smallholder households in Papua New Guinea                                                                                             |
| 114  | 16640  | Hansen, T.S.                                                                               | 2005             | Singapore Journal of Tropical Geography                            | Spatio-temporal aspects of land use and land cover changes in the Niah catchment, Sarawak, Malaysia                                                                                  |
| 115  | 16675  | Folving, R. and Christensen, H.                                                            | 2007             | Geografisk Tidsskrift-<br>Danish Journal of Geography              | Farming system changes in the Vietnamese uplands - Using fallow length and farmers' adoption of Sloping Agricultural Land Technologies as indicators of environmental sustainability |

| UNID | DOC ID | Author(s)                                                    | Publication Year | Journal/Publication                                                                                                          | Publication Title                                                                                                                                                       |
|------|--------|--------------------------------------------------------------|------------------|------------------------------------------------------------------------------------------------------------------------------|-------------------------------------------------------------------------------------------------------------------------------------------------------------------------|
| 118  | 17182  | Castella, J.C. et al                                         | 2012             | Human Ecology                                                                                                                | Effects of Landscape Segregation on Livelihood Vulnerability: Moving From Extensive Shifting Cultivation to Rotational Agriculture and Natural Forests in Northern Laos |
| 119  | 16617  | D. D. Poudel, T. M. Nissen and D. J. Midmore                 | 1999             | Mountain Research and Development                                                                                            | Sustainability of commercial vegetable production under fallow systems in the uplands of Mindanao, the Philippines                                                      |
| 121  | 8897   | Colchester, M and Chao S                                     | 2011             | Book                                                                                                                         | Oil Palm Expansion in South East Asia Trends and implications for local communities and indigenous peoples                                                              |
| 201  | 1273   | Ongprasert, Somchai & Prinz, Klaus                           | 2004             | Southeast Asian Studies                                                                                                      | Intensification of shifting cultivation by the use of Viny legumes in Northern Thailand                                                                                 |
| 202  | 3526   | Jakobsen, Jens                                               | 2006             | Geografisk Tidsskrift, Danish Journal of Geography                                                                           | The role of NTFPs in a shifting cultivation systems in transition: A village case study from the uplands of North Central Vietnam                                       |
| 203  | 8957   | Viau, Julien; Keophosay, Anousith; Castella, Jean Christophe | 2011             | Report                                                                                                                       | Impact of maize expansion on traditional rice production system in Northern Lao PDR                                                                                     |
| 206  | 15611  | Dove, Michael                                                | 1993             | Economic Botany                                                                                                              | Smallholder Rubber and Swidden Agriculture in Borneo: A sustainable adaptation to the ecology and economy of the tropical forest                                        |
| 207  | 15612  | Turner, Sarah                                                | 2012             | The Professional Geographer                                                                                                  | Forever Hmong: Ethnic minority livelihoods and Agrarian transition in upland northern Vietnam                                                                           |
| 208  | 15718  | Manivong, V.; Cramb, R.A.                                    | 2008             | Book Chapter: D.J. Snelder and R.D. Lasco (eds.), Smallholder Tree Growing for Rural Development and Environmental Services. | The adoption of smallholder rubber production by shifting cultivators in northern Laos: A village case study                                                            |
| 209  | 15850  | Ducourtieux, Olivier                                         | 2006             | Report                                                                                                                       | Is the diversity of shifting cultivation held in high enough esteem in Lao PDR?                                                                                         |
| 210  | 16070  | Bouahom, B; Douangsavanh, L; Rigg, J.                        | 2004             | Geoforum                                                                                                                     | Building sustainable livelihoods in Laos: untangling farm from non-farm, progress from distress                                                                         |
| 212  | 16118  | Josol, R. C.; Montefrio, J.F.                                | 2013             | Agroecology and                                                                                                              | Understanding the resilience of swidden agroecosystems                                                                                                                  |

| <b>UNID</b> | <b>DOC ID</b> | <b>Author(s)</b>                  | <b>Publication Year</b> | <b>Journal/Publication</b> | <b>Publication Title</b>                                                                                      |
|-------------|---------------|-----------------------------------|-------------------------|----------------------------|---------------------------------------------------------------------------------------------------------------|
|             |               |                                   |                         | Sustainable Food Systems   | interacting with rubber and oil palm production regimes in the Philippines                                    |
| 213         | 16210         | Padoch, C; Harwell, E, Susanto, A | 1998                    | Human Ecology              | Swidden, Sawah, and In-between: Agricultural transformation in Borneo                                         |
| 215         | 8938          | Fitriana, Y. R.                   | 2008                    | Masters Thesis             | Landscape and farming system in transition: case study in Viengkham District, Luang Prabang Province, Lao PDR |



**Table S3. Critical Appraisal Tool**

| Quality Domain            | Description/considerations                                                                                                  | Score<br>[0=no, 1 = unclear; 2= yes] | Support for assessment<br>[Copy text from study and justify score]                                   | Page & Paragraph |
|---------------------------|-----------------------------------------------------------------------------------------------------------------------------|--------------------------------------|------------------------------------------------------------------------------------------------------|------------------|
| <b>Study Directness</b>   | 1. Does the study consider the population, exposure and comparators of interest in the review?                              | 0                                    |                                                                                                      |                  |
|                           | <i>Sub total (max 2)</i>                                                                                                    | 0                                    | NOTE: If this Scores 0 then do not proceed any further as the article is excluded based on relevance |                  |
| <b>Conceptual Framing</b> | 2. Does the study set out a theoretical or conceptual framework and hypothesis, theory or central argument which is tested? |                                      |                                                                                                      |                  |
|                           | <i>Sub total (max 2)</i>                                                                                                    | 0                                    |                                                                                                      |                  |
| <b>Transparency</b>       | 3. Are details of the study location and population provided?                                                               |                                      |                                                                                                      |                  |
|                           | 4. Are the aims and objectives of the research clearly stated?                                                              |                                      |                                                                                                      |                  |
|                           | <i>Sub total (max 4)</i>                                                                                                    | 0                                    |                                                                                                      |                  |

| Quality Domain  | Description/considerations                                                                                                           | Score<br>[0=no, 1 = unclear; 2= yes] | Support for assessment<br>[Copy text from study and justify score] | Page &<br>Paragraph |
|-----------------|--------------------------------------------------------------------------------------------------------------------------------------|--------------------------------------|--------------------------------------------------------------------|---------------------|
| Appropriateness | 5. Is the research design clearly specified and appropriate for the aims and objectives of the research?                             |                                      |                                                                    |                     |
|                 | 6. Do the researchers display sufficient data to support their interpretations and conclusions?                                      |                                      |                                                                    |                     |
|                 | 7. Is the duration of study adequate?                                                                                                |                                      |                                                                    |                     |
|                 | <i>Sub total (max 6)</i>                                                                                                             | 0                                    |                                                                    |                     |
| Validity        | 8. Measurement validity: Are selected indicators or measures appropriate for the stated outcome of interest given the local context? |                                      |                                                                    |                     |
|                 | 9. Internal validity (Credibility): Are confounding variables or sources of bias identified and mitigated for?                       |                                      |                                                                    |                     |
|                 | 10. External validity (Transferability): are the results or findings transferable to other contexts,                                 |                                      |                                                                    |                     |

| <b>Quality Domain</b> | <b>Description/considerations</b>                                                                                              | <b>Score</b><br>[0=no, 1 = unclear; 2= yes] | <b>Support for assessment</b><br>[Copy text from study and justify score] | <b>Page &amp; Paragraph</b> |
|-----------------------|--------------------------------------------------------------------------------------------------------------------------------|---------------------------------------------|---------------------------------------------------------------------------|-----------------------------|
|                       | locations and settings outside those in the study area?                                                                        |                                             |                                                                           |                             |
|                       | <i>Sub total (max 6)</i>                                                                                                       | 0                                           |                                                                           |                             |
| <b>Reliability</b>    | 11. Stability: has the study demonstrated appropriate application of stated measurement and consistency of data gathering?     |                                             |                                                                           |                             |
|                       | <i>Sub total (max 2)</i>                                                                                                       | 0                                           |                                                                           |                             |
| <b>Cogency</b>        | 12. Is the study consistent from proposing a conceptual framework through methodology, data gathering, results and conclusion? |                                             |                                                                           |                             |
|                       | <i>Sub total (max 2)</i>                                                                                                       | 0                                           |                                                                           |                             |
|                       | <i>Total score (max 24)*</i>                                                                                                   | 0                                           |                                                                           |                             |

\*Quality Rating 19-24: High Quality; 13>18: Moderate Quality; 7>12: Low Quality; 0-6: Very Low Quality

**Table S4 Risk of Bias Tool**

| <b>Bias Domain</b>                             | <b>Risk Rating</b> | <b>Support for assessment where available</b><br>[Copy text from study and include reasons for score] |
|------------------------------------------------|--------------------|-------------------------------------------------------------------------------------------------------|
| SELECTION BIAS DUE TO INADEQUATE RANDOMISATION |                    |                                                                                                       |
| PERFORMANCE BIAS                               |                    |                                                                                                       |
| DETECTION BIAS                                 |                    |                                                                                                       |
| ATTRITION BIAS DUE TO INCOMPLETE OUTCOME DATA  |                    |                                                                                                       |
| REPORTING BIAS DUE TO SELECTIVE REPORTING      |                    |                                                                                                       |
| OTHER BIAS                                     |                    |                                                                                                       |
| SUMMARY ASSESSMENT:                            |                    |                                                                                                       |

**Table S5 Summary of drivers and outcomes with explanations for each category**

| <b>Driver/Outcome</b>    | <b>Aggregated Category (QCA Code)</b>        | <b>Constituent Category</b> | <b>Description</b>                                                                                                                                                                        | <b>Sample Text (Study ID)</b>                                                                                                                                                                                                                                                                                                                                                  |
|--------------------------|----------------------------------------------|-----------------------------|-------------------------------------------------------------------------------------------------------------------------------------------------------------------------------------------|--------------------------------------------------------------------------------------------------------------------------------------------------------------------------------------------------------------------------------------------------------------------------------------------------------------------------------------------------------------------------------|
| <b>Underlying Driver</b> | Land Use Policies (LUP)                      | Land Use Policies           | Policies which determine the use of and governance over land including land allocation i.e. Forest and Land Use Planning or Land Use Planning laws in Vietnam and Laos                    | <i>The conversion from shifting cultivation areas to rubber plantations is driven by the government policy that aims to reduce shifting cultivation (UNID 17)</i>                                                                                                                                                                                                              |
| <b>Underlying Driver</b> | State/NGO Agricultural Intervention (AG_Ext) | Extension                   | Government/non-government led schemes or activities designed to support, incentivise or even enforce a transition away from swidden agriculture through provision of technical guidance.  | <i>We found that the economic incentives evolving from the changing market environments along with the improved access to the modern agricultural inputs, namely fertilizers and improved varieties of the wetland rice, as well as access to the agricultural extension services were major driving forces of the rapid expansion of wetland rice cultivation. (UNID 104)</i> |
|                          |                                              | Technology                  | Technological interventions such as irrigation infrastructure and improved germplasm which are designed to support a transition away from Swidden.                                        | <i>The technology transfer in the village is primarily villager-to-villager rather than through an agricultural extension agent, although Chinese entrepreneurs have been an emerging source of technical information. (UNID 111)</i>                                                                                                                                          |
|                          |                                              | Subsidy/Incentive           | Government provided cash or agricultural materials (seeds, equipment etc) to adopt a new crop or practice                                                                                 | <i>local government officials also provided small amounts of pesticide free-of-charge to farmers who cultivated rai (UNID 8)</i>                                                                                                                                                                                                                                               |
| <b>Underlying Driver</b> | Population Increase (POP)                    | Population Increase         | Observed increase in absolute population or population density in the area of interest. T                                                                                                 | <i>population growth, resettlement and land reform have had a very significant impact on farmers' access to land in Ban Lak Sip, engendering a ten-fold increase in population density per unit of agricultural land over the last quarter of a century and propelling a rapid intensification of the shifting cultivation system. (UNID 55)</i>                               |
| <b>Underlying Driver</b> | Market Influence (MAR_INF)                   | Market Influence            | Market based drivers which could include access to markets via intermediaries, increased prices for products and incentive schemes from government/other actors to increase production of | <i>Moreover, increased trade and market integration with neighboring countries (mainly China, Vietnam, and Thailand) and the partial commoditization of land has spurred many local people to shift from subsistence</i>                                                                                                                                                       |

| <b>Driver/Outcome</b>      | <b>Aggregated Category (QCA Code)</b> | <b>Constituent Category</b>                     | <b>Description</b>                                                                                                                                                                                                                                                           | <b>Sample Text (Study ID)</b>                                                                                                                                                                                                                                                                                                                                   |
|----------------------------|---------------------------------------|-------------------------------------------------|------------------------------------------------------------------------------------------------------------------------------------------------------------------------------------------------------------------------------------------------------------------------------|-----------------------------------------------------------------------------------------------------------------------------------------------------------------------------------------------------------------------------------------------------------------------------------------------------------------------------------------------------------------|
|                            |                                       |                                                 | a certain crop.                                                                                                                                                                                                                                                              | <i>based to market-based production.</i>                                                                                                                                                                                                                                                                                                                        |
| <b>Underlying Driver</b>   | Expanding Infrastructure (INFRA)      | Expanding Infrastructure                        | This usually refers to roads, especially those linking communities to markets                                                                                                                                                                                                | <i>The improvement and construction of rural roads and relocation of many villages to these roads in the 1970s further helped to tie shifting cultivators more permanently to the market economy. (UNID 16)</i>                                                                                                                                                 |
| <b>Underlying Driver</b>   | Commodity Price Fluctuation (CPF)     | Commodity Price Increase                        | Increase in commodity price interpreted as a signal to increase production of a given crop. Also refers to commodity price shocks which force producers to abandon a crop. Signals a change towards intensification of cash crops because of better prices/linked to markets | <i>the rising crop prices and demand made the Tagbanua farmers further venture into fruit cropping, as they usually plant fruit crops after planting upland rice in their swidden plots.(UNID 105)</i>                                                                                                                                                          |
|                            |                                       | Commodity Price Decrease                        | Decrease in commodity price (often sudden i.e. a shock) which drives a change in practice and or crop selection/arrangement. A cause of insecurity and perhaps better captured in the outcome “single crop dependency”                                                       | <i>Farmers were dismayed by the low amount they received and the level of debt associated with these entitlements. Most decided to sell during the economic crisis when they faced a collapse in rubber prices (UNID 59)</i>                                                                                                                                    |
|                            |                                       | New Crop selection in response to Market Demand | Alternative land use i.e. new crop choice driven by increased market demand i.e. inflated price of rubber/pepper etc.                                                                                                                                                        | <i>It turned out that market adjustment of monetary value of the Indonesian Rupiah (Rp.) against the US dollar substantially increased the farm-gate price of exportable crops such as rubber, patchouli, cocoa, gambir, etc., therefore creating an incentive for the cultivation of these crops (UNID 104)</i>                                                |
| <b>Proximate Condition</b> | Individualisation of tenure (IND_TEN) | Individualisation of tenure                     | Customary land rights give way to private ownership of land (by either an individual or family) which drives transitions away from traditional uses towards activities which increase individual household income and benefits.                                              | <i>The new forest classifications have also brought new types of management and control. Previously, land use had always been organized through the village patriarch. Now, local people must apply for rights to long-term use of forest land at commune level, through government agencies like Commune People’s Committees and Forest Management Boards.</i> |
| <b>Proximate Condition</b> | Intensification (INTFY)               | Intensification: land policy                    | Land use (either swidden or the alternative land use) becomes more intensified as a result of a policy which restricts, alters or influences the type or extent of swidden practice.                                                                                         | <i>With market integration, agricultural and livestock products have provided important income sources for some households that have decreased their reliance on forest products and expanded and intensified the area</i>                                                                                                                                      |

| Driver/Outcome             | Aggregated Category (QCA Code)                         | Constituent Category                     | Description                                                                                                                                                                                                                                                 | Sample Text (Study ID)                                                                                                                                                                                                                                                                                                                                                                                                                                                             |
|----------------------------|--------------------------------------------------------|------------------------------------------|-------------------------------------------------------------------------------------------------------------------------------------------------------------------------------------------------------------------------------------------------------------|------------------------------------------------------------------------------------------------------------------------------------------------------------------------------------------------------------------------------------------------------------------------------------------------------------------------------------------------------------------------------------------------------------------------------------------------------------------------------------|
|                            |                                                        | Intensification (other/not specified)    | This category was used when there had been an intensification of some kind but that could not be directly linked to an underlying policy. This was often the case in quantitative ecosystem services paper which describe an intensification but no driver. | <i>used for agriculture to the detriment of the forest. Old fallows and secondary forests have been turned into permanent crops.(UNID 118)</i><br><i>Thus overall, this increased cropping intensity with 2 years of cultivation followed by 2 years of fallow and associated with the replacement of upland rice by Job's tear and maize, led to an increase in mean annual total sediment yield (5.9 Mg ha 1 year 1) or a 600% increase when compared to the previous system</i> |
| <b>Proximate Condition</b> | Restriction of LFS livelihood activities (RESTRICT_LH) | Restriction of LFS livelihood activities | E.g. The article says the ban on opium and timber felling caused farmers to go to the mountain to clear more areas for rice paddies and corn. The point is that it was a major cash source.                                                                 | <i>"I remember one time many police came to this village to check every family.They stated, 'Stop growing opium, if you do not stop we will take your buffaloes, your pigs, your horses, all of them will be taken. We will go up to your room [rice storage], and we will take it all.' " Not surprisingly, Lue noted that this had caused considerable resentment among local Hmong residents, as their revenues declined rapidly. (UNID 207)</i>                                |
| <b>Proximate Condition</b> | Reduction in Upland Rice Productivity (RED_UPRICE)     | Reduction in Upland Rice Productivity    | Productivity of existing swidden system (of which upland rice is an integral part) is reduced for an unspecified reason but it is this which precipitates the outcome/s identified.                                                                         | <i>According to respondents, since rubber was introduced to Hadyao, upland rice cultivation had changed significantly. Nearly 75 percent reported that they cultivated a smaller area of upland rice after planting rubber. (UNID 208)</i>                                                                                                                                                                                                                                         |
| <b>Proximate Condition</b> | Restricted Land Access (RESTRICT_LAND)                 | Restricted Land Access                   | Physical restriction to land via enforced allocation, enclosure, tenure arrangements etc.                                                                                                                                                                   | <i>among the 29 farmers who reported decreasing yields, 23 mentioned short fallow periods as the main proximate cause, while soil erosion was cited only once. (UNID 55)</i>                                                                                                                                                                                                                                                                                                       |
| <b>Outcome</b>             | Reduced access to fallow land (RED_ACC_FALLOW)         | Reduced access to fallow land            | Fallow land availability and access decreased                                                                                                                                                                                                               | <i>LUPLA also aimed at substituting individual land certificates for customary land tenure arrangements (i.e., right of clearance or 'axe rights'). Each household was allocated three upland plots, which meant that the maximum fallow period possible was limited to two years.(UNID 118)</i>                                                                                                                                                                                   |

| Driver/Outcome | Aggregated Category (QCA Code)                                                              | Constituent Category                 | Description                                                                                                                                                                | Sample Text (Study ID)                                                                                                                                                                                                                                                                                                                   |
|----------------|---------------------------------------------------------------------------------------------|--------------------------------------|----------------------------------------------------------------------------------------------------------------------------------------------------------------------------|------------------------------------------------------------------------------------------------------------------------------------------------------------------------------------------------------------------------------------------------------------------------------------------------------------------------------------------|
| Outcome        | Land Conflict (LAND_CONFL)                                                                  | Land Conflict                        | Changes in swidden practice or adoption of alternative land use leads to conflicts over access to and rights over land within and between communities and external actors. | <i>"Our respondents explain that aside from immediate economic needs, the growth of oil palm has influenced the way they make decisions about their land. First, indigenous swidden farmers sell their lands to prospective oil palm growers (mostly outsiders) in order to evade conflict with neighboring landowners." (UNID 212)</i>  |
| Outcome        | Reduction of customary practices (RED_CUSTOM)<br>Reduced Socio-Cultural Wellbeing (RED_SOC) | Reduction of customary practices     | This could be the change in roles of the village headman or rights, rituals and practices associated with swidden                                                          | <i>This [shift from swidden] has resulted in a loss of traditional knowledge as well as traditional forest management practices, all cornerstones in traditional Co Tu society.(UNID 102)</i>                                                                                                                                            |
|                |                                                                                             | Social problems increased            | Increased social issues documented e.g. alcohol, drugs, crime, etc)                                                                                                        | <i>In LongSegar and its offshoot communities, social problems have increased (drinking, drugs, prostitution, theft). There is more conflict (over ethnicity, rights, resources), and there is less security of access to resources. Their territory has been steadily squeezed by logging, plantations, and transmigration (UNID 18)</i> |
|                |                                                                                             | Constraints on local decision making | Autonomy to make own decisions about how land is managed and crop selection is reduced because of alternative land use                                                     | <i>The second non-financial concern was the difficulty of keeping autonomy of the villagers. Their autonomy would be threatened with respect to the selection of shipments as well as constraints regarding the change of land use choice, intercultural and rigid work regulations. (UNID 5)</i>                                        |
|                |                                                                                             | Increased or re-enforced Inequality  | Existing inequality due to financial or social differences is exacerbated or new inequality emerges                                                                        | <i>the inclusion of cash crops and livestock and the development of the paddy area have led to household inequality and stratification whereby some have access to more luxuries, i.e. power, television, motorcycles. (UNID 69)</i>                                                                                                     |
|                |                                                                                             | Health or nutrition worsened         | Worsening health of communities involved in the transition                                                                                                                 | <i>Although many Akha who settled on the lower slopes have improved their economic prospects through access to wet-rice land especially the villages of Ban</i>                                                                                                                                                                          |



| Driver/Outcome | Aggregated Category (QCA Code)                | Constituent Category                              | Description                                                                                                | Sample Text (Study ID)                                                                                                                                                                                                                                                                                                                                               |
|----------------|-----------------------------------------------|---------------------------------------------------|------------------------------------------------------------------------------------------------------------|----------------------------------------------------------------------------------------------------------------------------------------------------------------------------------------------------------------------------------------------------------------------------------------------------------------------------------------------------------------------|
|                |                                               |                                                   |                                                                                                            | <i>Sopi Mai and Ban Yang Luang discussed above &amp; these gains have been largely negated by increased human and livestock mortality that has accompanied resettlement.(UNID 110)</i>                                                                                                                                                                               |
| <b>Outcome</b> | Increase in income from alt. LU (INCOME_UP)   | Increase in income from alt. LU                   | > Income                                                                                                   | <i>About 69 percent of the households mentioned that their highest ranking income source was rubber. Hence rubber had clearly become the major source of income in the village.(UNID 208)</i>                                                                                                                                                                        |
|                |                                               | Increase in remittance                            | > Income from external sources                                                                             | <i>About 28 percent of households reported that their only source of cash income was selling tub-lump rubber; 29 percent only earned income from other sources (livestock, other cash crops, selling rubber seedlings, working for wages, and from relatives in the USA); the remaining 43 percent received income from both rubber and other sources.(UNID 208)</i> |
| <b>Outcome</b> | Increased income diversification (INCOME_DIV) | Increased income diversification                  | Increase in number and type of income sources. This is not valued i.e. not considered positive or negative | <i>Diversification is back in favour as systems become more mixed, but it is back from a strictly economic, rather than an ecological or traditional, perspective.</i>                                                                                                                                                                                               |
| <b>Outcome</b> | Narrowing of livelihood options (NARROW_LH)   | Narrowing of livelihood options                   | Forced to sell livestock, NTFPS, illegal logs etc for cash/rice as a result of swidden transition.         | <i>They are, it could be said, facing an existential squeeze: declining availability of food is causing villagers to turn to the market to meet their needs; but a concomitant decline in cash generation from NTFPS and livestock is also compromising their ability to meet this shortfall through market exchange.(UNID 62)</i>                                   |
|                |                                               | Less diversified Livelihood strategies            | i.e. shifting more towards monocropping or reliance on single livelihood component                         | <i>Smallholders, for example, have possibly traded long term food security for short-term income gains by expanding the area of oil palm production, thereby leaving themselves more vulnerable to the vagaries of world market prices for palm oil (UNID 113)</i>                                                                                                   |
| <b>Outcome</b> | Single crop dependency (MONO_CROP)            | Increase in vulnerability: single crop dependency | Reliance on one crop and the removal of the buffer provided by swidden agriculture                         | <i>Farmers dependent on monocultured oil palm plantations can become vulnerable to socioeconomic shocks, as such system does not permit the same level of response diversity.(UNID 212)</i>                                                                                                                                                                          |

| Driver/Outcome | Aggregated Category (QCA Code)                                        | Constituent Category                                       | Description                                                                                                                                                                                                                                                      | Sample Text (Study ID)                                                                                                                                                                                                                                                                                                                     |
|----------------|-----------------------------------------------------------------------|------------------------------------------------------------|------------------------------------------------------------------------------------------------------------------------------------------------------------------------------------------------------------------------------------------------------------------|--------------------------------------------------------------------------------------------------------------------------------------------------------------------------------------------------------------------------------------------------------------------------------------------------------------------------------------------|
| Outcome        | Decline in staple self-sufficiency/yield (DEC_STAPLE)                 | Decline in staple self-sufficiency/yield                   | Staple component of swidden system is reducing                                                                                                                                                                                                                   | <i>The decreasing fallow periods and restrictions in access to forest areas lay another reason for the decreasing swidden productivity (UNID 105).</i>                                                                                                                                                                                     |
| Outcome        | Decreased food security (DEC_FOODSEC)                                 | Decreased food security                                    | This category is only for those cases in which food security. In our analysis we will need to define what we mean by food security or a number of categories are combined under food security i.e staples, diversification, labour productivity & nutrition etc? | <i>Food security will be negatively influenced by the decline in shifting cultivation as Ban Navene faces mandated restrictions without the provision of alternative livelihood options (UNID 69)</i>                                                                                                                                      |
| Outcome        | De-prioritising of upland rice or swidden crops (DEPRIOR_UPRICE)      | De-prioritising of upland rice or swidden crops            | Hill rice becomes supplementary (in place of rubber, paddy etc.)                                                                                                                                                                                                 | <i>The landscapes mosaics have homogenized as maize replaced upland rice shifting cultivation system at the bottom of the hill sides and then progressed upwards towards the hill tops.(UNID 203)</i>                                                                                                                                      |
| Outcome        | Decline in soil fertility due to shorter fallow/cash crop (DEC_SOILF) | Decline in soil fertility due to swidden intensification   | Soil parameters indicate a reduction in fertility owing to intensification of swidden system i.e. shortening of fallow.                                                                                                                                          | <i>As the length of fallow period was shortened and soil fertility declined, the contribution of swiddening to household income decreased in later years.(UNID 58)</i>                                                                                                                                                                     |
|                |                                                                       | Decline in soil fertility due to cash crop intensification | Soil parameters indicate a <b>reduction</b> in fertility owing to intensification of cash crops replacing and when compared with swidden                                                                                                                         | <i>Intensification of land use per surface unit, as found in cash crops and perennial plantations, has also caused problems for maintaining soil fertility and the risk of soil erosion.(UNID 215)</i>                                                                                                                                     |
|                |                                                                       | Increased Sediment Yield                                   | Sediment yield increases as a result of swidden transition. This is interpreted as a reduction in soil fertility as the top soil is lost                                                                                                                         | <i>Thus overall, this increased cropping intensity with 2 years of cultivation followed by 2 years of fallow and associated with the replacement of upland rice by Job's tear and maize, led to an increase in mean annual total sediment yield (5.9 Mg ha 1 year 1) or a 600% increase when compared to the previous system (UNID 54)</i> |
| Outcome        | Decrease in forest                                                    | Decrease in forest cover/carbon                            | Decrease in forest cover and/or above ground carbon                                                                                                                                                                                                              | <i>This statement was confirmed by our analysis of a chronological series of land-use maps (1954, 1977,</i>                                                                                                                                                                                                                                |

| Driver/Outcome | Aggregated Category (QCA Code)                                       | Constituent Category                   | Description                                                                                                                                                                                 | Sample Text (Study ID)                                                                                                                                                                                                                                                                                                                                                                                                                                                                                            |
|----------------|----------------------------------------------------------------------|----------------------------------------|---------------------------------------------------------------------------------------------------------------------------------------------------------------------------------------------|-------------------------------------------------------------------------------------------------------------------------------------------------------------------------------------------------------------------------------------------------------------------------------------------------------------------------------------------------------------------------------------------------------------------------------------------------------------------------------------------------------------------|
| Outcome        | cover/carbon (DEC_FOR)<br>Increased Labor Input (INC_LAB)            | Increased Labor Input                  | Labour demand is increased as a result of swidden transition – perhaps associated with additional labour required for weeds or labour being diverted to other non-staple related activities | 1998) that revealed the rapid decrease in forest cover between 1977 and 1998 in the study area (UNID 112)<br>Informants considered fields made after short fallow to require more labour, which conflicts with records of labour input. The reason could be that clearing long fallow plots requires more or at least similar labour inputs compared to the labour needed for extra weeding after short fallow, and therefore overall labour requirements may in some cases be higher after long fallow. (UNID 9) |
| Outcome        | Decrease in labor productivity (DEC_LABPROD)                         | Decrease in labor productivity         | Productivity of labour i.e. the amount of person hours/day/hectare required to produce the same amount of output (e.g. yield) has reduced                                                   | This land use intensification entails a higher rate of increase in the agricultural labour input than the agricultural output, thereby causing a decline in labour productivity and food security (UNID 202)                                                                                                                                                                                                                                                                                                      |
| Outcome        | Specialisation/re distribution of labour: on and Off Farm (LAB_SPEC) | Specialisation of labour               | Labour is more specialised or redistributed to other tasks not associated with swidden                                                                                                      | During pepper price surges in the late 1980s and late 1990s, men stayed home to cultivate pepper; conversely, when prices dropped, men returned to long-distance wage work. Also evident in these data is a lag in men stopping wage work as prices rise, such that absences do not reach their lowest points until pepper prices have peaked.(UIND 111)                                                                                                                                                          |
| Outcome        | Increased biophysical constraints (BIO_CONSTR)                       | Increased Inputs: pesticide/fertilizer | Inputs required to maintain/enhance soil productivity or reduce pests/weeds have increased.                                                                                                 | Households who did not apply fertilizers mentioned that they were eager to apply them but did not have enough money. All the households wanted to apply more fertilizers if possible. More than 70 % of the households used herbicides. Most of them told that after fertilizer application, the increase in the weed population and resulting difficulty in controlling weeds had motivated them to start using herbicides (UNID 29)                                                                             |
|                |                                                                      | Increase in weed pressure              | Incidence of weeds or labour required to remove them has increased                                                                                                                          | Local farmers consider that the fallow period is short if it is less than 6 years. They believe that short-fallow fields have more weeds. They have to weed four times                                                                                                                                                                                                                                                                                                                                            |

| Driver/Outcome | Aggregated Category (QCA Code)         | Constituent Category       | Description                                                                                          | Sample Text (Study ID)                                                                                                                                                                                                                                                                                                                                                                                                                          |
|----------------|----------------------------------------|----------------------------|------------------------------------------------------------------------------------------------------|-------------------------------------------------------------------------------------------------------------------------------------------------------------------------------------------------------------------------------------------------------------------------------------------------------------------------------------------------------------------------------------------------------------------------------------------------|
| <b>Outcome</b> | Criminalisation of swidden (CRIM_SWID) | Criminalisation of swidden | Swidden becomes criminalised as a result of polices and a transition away from traditional practice. | <p><i>per crop incase of short-fallow, whereas only two weedings are needed in the case of long-fallow.(UNID 45)</i></p> <p><i>In particular, the anti-swidden ordinances have had a lasting negative impact on the local subsistence security and agro-ecological diversity of swiddens. As a result of the ban, Tagbanua farmers who had cleared, but not yet burned and planted, their swiddens were left without harvests.(UNID 15)</i></p> |

**Table S6: Details of studies included in the quantitative meta-analysis. The ‘UNID’ can be used to cross reference with results presented in figures 4 – 6 in the main manuscript with full references included in Table S2 (this document).**

| UNID | DOC ID | Author                     | Year | Country | Transition Type            | Specific Transition                                 | Soil Type         |
|------|--------|----------------------------|------|---------|----------------------------|-----------------------------------------------------|-------------------|
| 32   | 4972   | Tanaka Tachibe, S et al    | 2009 | MY      | LFS to Perennial Cash Crop | LFS to Oil Palm                                     | Typic Dysrudepts  |
| 32   | 4972   | Tanaka Tachibe, S et al    | 2009 | MY      | LFS to Perennial Cash Crop | LFS to Rubber                                       | Typic Dysrudepts  |
| 32   | 4972   | Tanaka Tachibe, S et al    | 2009 | MY      | LFS to Perennial Cash Crop | LFS to Pepper                                       | Typic Dysrudepts  |
| 33   | 7374   | Neergaard, Magid and Mertz | 2008 | MY      | LFS to Perennial Cash Crop | LFS (Upland Rice) to Pepper                         | Tropudults        |
| 36   | 16308  | Woo et al.                 | 2011 | VN      | LFS to Forest              | > 10 Year fallow to Plantation                      | n.d.              |
| 37   | 16308  | Woo et al.                 | 2011 | VN      | LFS to Forest              | > 10 Year fallow to Plantation                      | n.d.              |
| 38   | 16148  | Sillitoe, P                | 1996 | PNG     | LFS to Annual Cash Crop    | >10 Year Fallow to > 5 Years Cash Crop Cultivation  | Inceptisols       |
| 38   | 16148  | Sillitoe, P                | 1996 | PNG     | LFS to Annual Cash Crop    | >10 Year Fallow to > 10 Years Cash Crop Cultivation | Inceptisols       |
| 44   | 16744  | Bruun, T.B. et al.         | 2013 | MY      | LFS to Perennial Cash Crop | LFS ->3yr Oil Palm (2002 vs 2011) 1a                | Ultisols (FAO)    |
| 44   | 16744  | Bruun, T.B. et al.         | 2013 | MY      | LFS to Perennial Cash Crop | LFS ->8yr Oil Palm (2002 vs 2011) 1a                | Ultisols (FAO)    |
| 44   | 16744  | Bruun, T.B. et al.         | 2013 | MY      | LFS to Perennial Cash Crop | LFS ->8yr Oil Palm (2002 vs 2011) 1b                | Ultisols (FAO)    |
| 44   | 16744  | Bruun, T.B. et al.         | 2013 | MY      | LFS to Perennial Cash Crop | LFS ->3yr Oil Palm (2002 vs 2011) 2a                | Ultisols (FAO)    |
| 47   | 7482   | Kenzo, T et al             | 2010 | MY      | LFS to Shorter Fallow      | 17 Year Fallow to 4 Year Fallow                     | Typic Kandihumult |
| 49   | 17186  | Bruun, T.B. et al.         | 2014 | LA      | LFS to Shorter Fallow      | 20 - 25 Year fallow to 7-10 year fallow             | Ultisols          |
| 49   | 17186  | Bruun, T.B. et al.         | 2014 | LA      | LFS to Shorter Fallow      | 20 - 25 Year fallow to Cultivated land              | Ultisols          |
| 49   | 17186  | Bruun, T.B. et al.         | 2014 | LA      | LFS to Shorter Fallow      | 20 – 25 Year fallow to 0 Year Fallow                | Ultisols          |
| 49   | 17186  | Bruun, T.B. et al.         | 2014 | LA      | LFS to Shorter Fallow      | 20 - 25 Year fallow to 3 - 4 year fallow            | Ultisols          |
| 49   | 17186  | Bruun, T.B. et al.         | 2014 | LA      | LFS to Shorter Fallow      | 7 - 10 Year fallow to 0 Year Fallow                 | Ultisols          |
| 50   | 17186  | Bruun, T.B. et al.         | 2014 | IN      | LFS to Annual Cash Crop    | 6 Year Fallow to Continuous Cultivation             | Ultisols          |
| 50   | 17186  | Bruun, T.B. et al.         | 2014 | IN      | LFS to Perennial Cash Crop | 6 Year Fallow to rubber                             | Ultisols          |
| 52   | 17212  | Chan et al.                | 2013 | MN      | LFS to Shorter Fallow      | 30 Year Fallow to 5 Year Fallow                     | Ultisols          |
| 52   | 17212  | Chan et al.                | 2013 | MN      | LFS to Shorter Fallow      | 25 Year Fallow to 5 Year Fallow                     | Ultisols          |
| 52   | 17212  | Chan et al.                | 2013 | MN      | LFS to Shorter Fallow      | 20 Year Fallow to 5 Year Fallow                     | Ultisols          |
| 52   | 17212  | Chan et al.                | 2013 | MN      | LFS to Shorter Fallow      | 30 Year Fallow to 1 Year Fallow                     | Ultisols          |
| 52   | 17212  | Chan et al.                | 2013 | MN      | LFS to Shorter Fallow      | 25 Year Fallow to 1 Year Fallow                     | Ultisols          |
| 52   | 17212  | Chan et al.                | 2013 | MN      | LFS to Shorter Fallow      | 20 Year Fallow to 1 Year Fallow                     | Ultisols          |
| 61   | 17189  | Lawrence, D. et al.        | 2007 | IN      | LFS to Perennial Cash Crop | 19 Year Fallow to Agroforestry                      | Clay Rich         |

| UNID  | DOC ID | Author             | Year | Country | Transition Type         | Specific Transition                     | Soil Type         |
|-------|--------|--------------------|------|---------|-------------------------|-----------------------------------------|-------------------|
| 64    | 16785  | Bruun, T.B. et al. | 2006 | MY      | LFS to Shorter Fallow   | 25 Year Fallow to 0 Year Fallow: Amat   | Ultisols/Oxisols  |
| 64    | 16785  | Bruun, T.B. et al. | 2006 | MY      | LFS to Shorter Fallow   | 14 Year Fallow to 0 Year Fallow: Amat   | Tropudults        |
| 69    | 17215  | Catherine Hepp     | 2013 | LA      | LFS to Shorter Fallow   | 11 Year Fallow to 3 Year fallow         | Ultisol           |
| 69    | 17215  | Catherine Hepp     | 2013 | LA      | LFS to Shorter Fallow   | 11 Year Fallow to 5 Year fallow         | Ultisol           |
| 69    | 17215  | Catherine Hepp     | 2013 | LA      | LFS to Shorter Fallow   | 11 Year Fallow to 2 Year fallow         | Ultisol           |
| 39-41 | 16392  | Funakawa, S. et al | 1997 | TH      | LFS to Shorter Fallow   | > 8 Year Fallow to < 4 Year Fallow      | Ustic Dystropepts |
| 39-41 | 16392  | Funakawa, S. et al | 1997 | TH      | LFS to Annual Cash Crop | LFS to vegetable cultivation (0 Fallow) | Ustic Dystropepts |
